# Supplementary material
Source: PubMed Central journal article supplement (PMC5773371)
Supplement: NIHMS904949-supplement-Supp_FigS2.pdf [file NIHMS904949-supplement-Supp_FigS2.pdf]

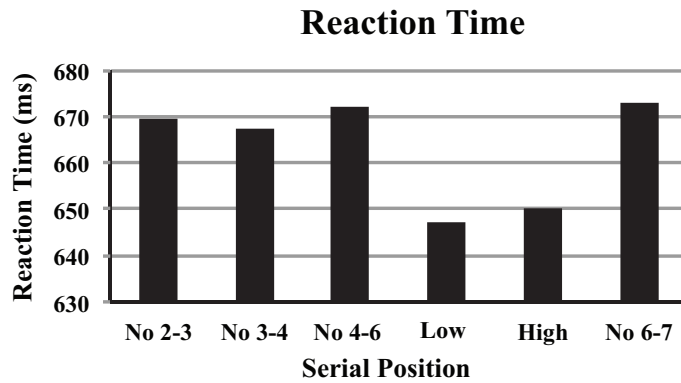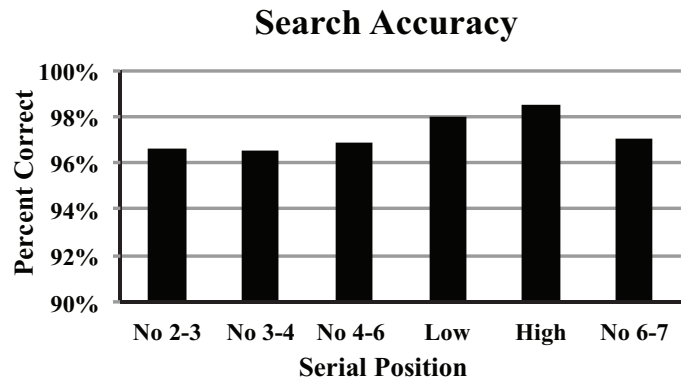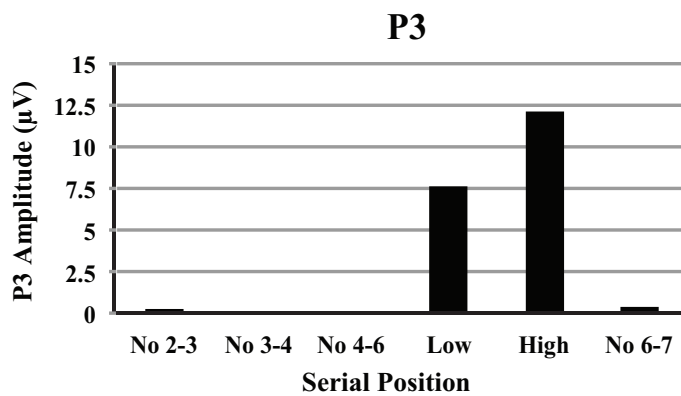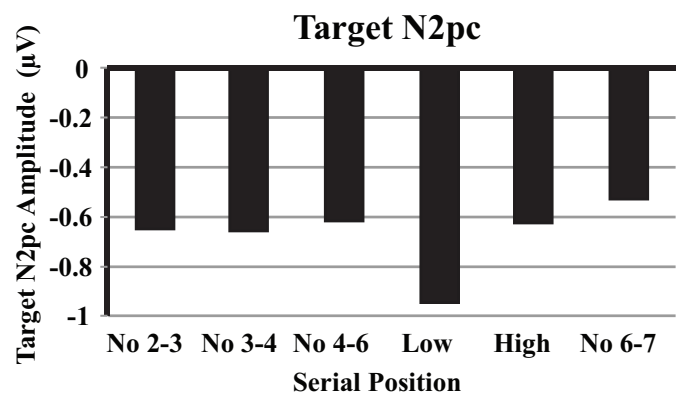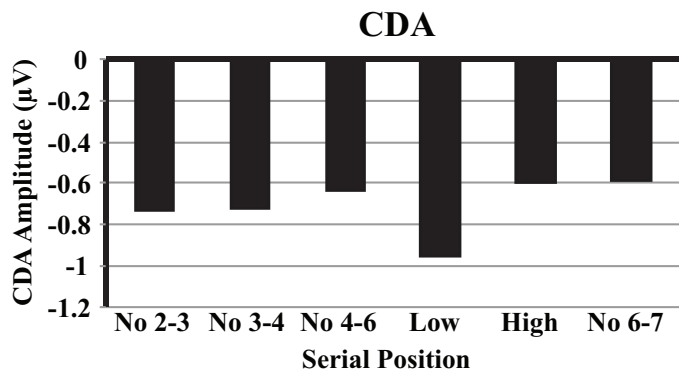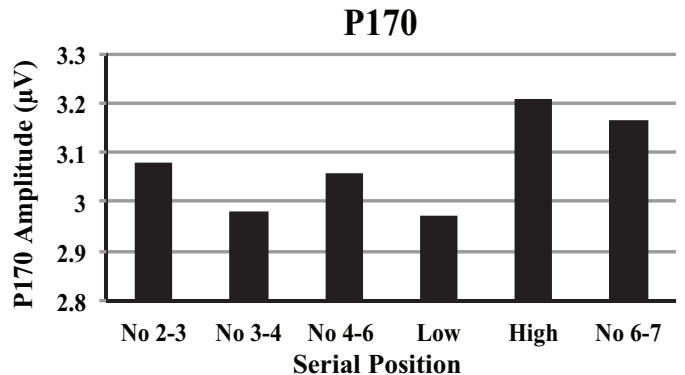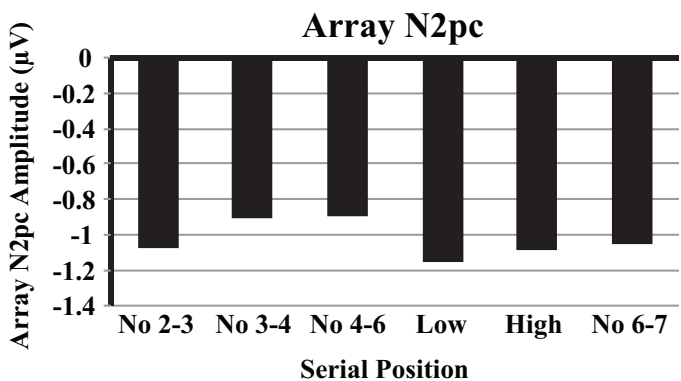

Figure S2. Dependent variables at different average serial positions for no reward trials. Low and high reward trials both occur at serial position 5. The average of trials 4 and 6 was used as the no-reward value for all analyses.
