# Supplementary material
Source: PubMed Central journal article supplement (PMC5773371)

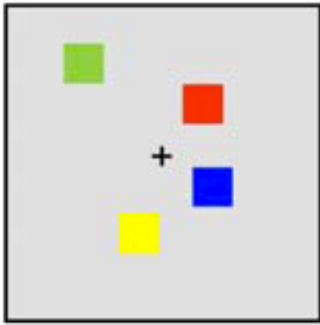

Memory array  
150 ms

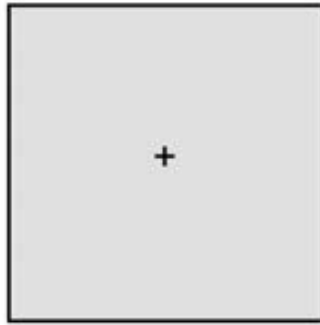

Retention interval  
900 ms

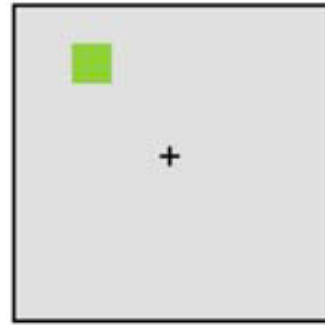

Probe  
until response

Supplement: NIHMS904949-supplement-Supp_FigS1.pdf [file NIHMS904949-supplement-Supp_FigS1.pdf]
